# Supplementary material for: Polystyrene Nanoplastics in Aquatic Microenvironments Affect Sperm Metabolism and Fertilization of Mytilus galloprovincialis (Lamark, 1819)
Source: MDPI journal article supplement (doi:10.3390/toxics11110924), 2023-11-11
Supplement: s1 [file s1]

# Polystyrene Nanoplastics in Aquatic Microenvironments Affect Sperm Metabolism and Fertilization of *Mytilus galloprovincialis* (Lamark, 1819)

Martina Contino <sup>1,\*</sup>, Greta Ferruggia <sup>1</sup>, Stefania Indelicato <sup>1</sup>, Roberta Pecoraro <sup>1</sup>, Elena Maria Scalisi <sup>1</sup>, Antonio Salvaggio <sup>2</sup> and Maria Violetta Brundo <sup>1</sup>

<sup>1</sup> Department of Biological, Geological and Environmental Sciences, University of Catania, Via Androne 81, 95124 Catania, Italy; greta.ferruggia@phd.unict.it (G.F.); stefania.indelicato@phd.unict.it (S.I.); roberta.pecoraro@unict.it (R.P.); elenamaria.scalisi@unict.it (E.M.S.); mariavioletta.brundo@unict.it (M.V.B.)

<sup>2</sup> Zooprophyllactic Institute of Sicily “A. Mirri”, Via Gino Marinuzzi, 3, 90129 Palermo, Italy; antonio.salvaggio@izssicilia.it

\* Correspondence: martinacontino@phd.unict.it; Tel.: +39-3271681121

## Supplementary materials

**Table S1.** Properties and percentages of mobile spermatozoa after exposure to 50 nm and 100 nm of NPs at increasing concentration.

|                     |               | CTRL         | 1 µg/L         | 10 µg/L        | 20 µg/L        | 50 µg/L        | 100 µg/L      |
|---------------------|---------------|--------------|----------------|----------------|----------------|----------------|---------------|
| <b>Motility (%)</b> | <b>50 nm</b>  | 75.23%±0.02  | 46.42%±0.03    | 29.30%±0.01    | 21.59%±0.02    | 18.76%±0.01    | 8.66%±0.02    |
|                     | <b>100 nm</b> |              | 55.86%±0.04    | 52.36%±0.02    | 54.65%±0.01    | 50.63%±0.004   | 52.18%±0.008  |
| <b>VCL</b>          | <b>50 nm</b>  | 378.76±0.015 | 244.53±0.01**  | 228.96±0.03**  | 216.93±0.032** | 122.74±0.022** | 82.23±0.02**  |
|                     | <b>100 nm</b> |              | 313.15±0.002   | 302.12±0.025   | 287.57±0.012   | 270.14±0.024   | 255.6±0.01    |
| <b>VAP</b>          | <b>50 nm</b>  | 250.84±0.032 | 149.78±0.023** | 125.84±0.001** | 89.61±0.014**  | 86.47±0.034**  | 76.36±0.03**  |
|                     | <b>100 nm</b> |              | 242.29±0.14    | 258.22±0.22    | 259.45±0.01    | 259.06±0.09    | 259.45±0.04   |
| <b>VSL</b>          | <b>50 nm</b>  | 81.56±0.023  | 83.70±0.052    | 104.6±0.034    | 117.77±0.25**  | 139.82±0.15**  | 146.03±0.12** |
|                     | <b>100 nm</b> |              | 79.72±0.075    | 78.93±0.03     | 78.91±0.01     | 76.88±0.36     | 83.13±0.56    |
| <b>LIN</b>          | <b>50 nm</b>  | 0.32±0.034   | 0.56±0.32      | 0.83±0.56      | 1.31±0.15**    | 1.62±0.1**     | 1.91±0.27**   |
|                     | <b>100 nm</b> |              | 0.33±0.36      | 0.3±0.027      | 0.3±0.15       | 0.29±0.12      | 0.32±0.08     |
| <b>WOB</b>          | <b>50 nm</b>  | 0.66±0.025   | 0.612±0.01     | 0.55±0.037     | 0.41±0.28**    | 0.7±0.09**     | 0.93±0.07**   |
|                     | <b>100 nm</b> |              | 0.77±0.02      | 0.85±0.08      | 0.9±0.06       | 0.96±0.56      | 1.01±0.67     |
| <b>PROG</b>         | <b>50 nm</b>  | 1840.29±0.15 | 1232.92±0.03*  | 1279.31±0.09*  | 1025.37±0.15** | 944.38±0.18**  | 759.44±0.11** |
|                     | <b>100 nm</b> |              | 1882.155±0.04  | 1848.3±0.044   | 1739.32±0.033  | 1861.13±0.022  | 1905.06±0.22  |

All data are presented as mean ± standard deviation. Significant data are represented with the symbol \* ( $p < 0.05$ ) and \*\* ( $p < 0.01$ ) and are highlighted in yellow.
